# Supplementary material for: Jumping performance of flea hoppers and other mirid bugs (Hemiptera, Miridae)
Source: Oxford University Press journal article supplement (doi:10.1242/jeb.154153), 2017-01-01
Supplement: jeb154153supp.pdf [file jeb154153supp.pdf]

## SUPPLEMENTARY MATERIAL

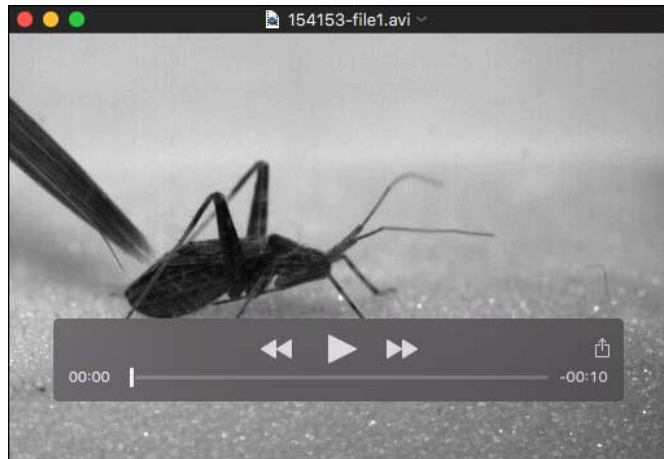

### Movie 1

Jump by *Phytocoris varipes* viewed from the side, captured at 5000 frames  $s^{-1}$  and with an exposure time of 0.1 ms and replayed at 10 frames  $s^{-1}$ . See also Fig. 2.

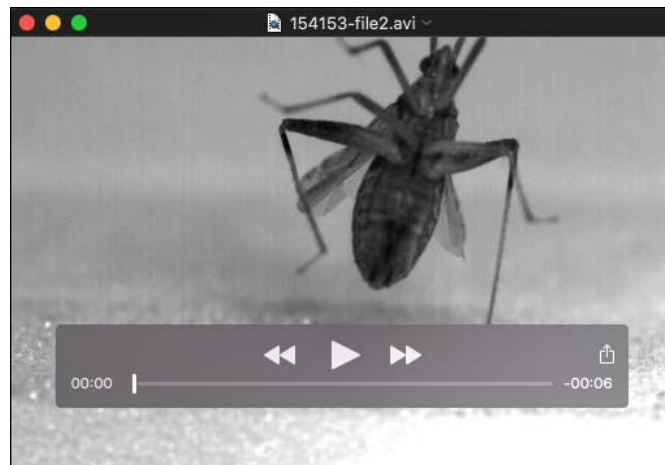

## Movie 2

Jump by *Phytocoris varipes* viewed from underneath, captured at 5000 frames  $s^{-1}$  and with an exposure time of 0.1 ms and replayed at 10 frames  $s^{-1}$ . See also Fig. 3.

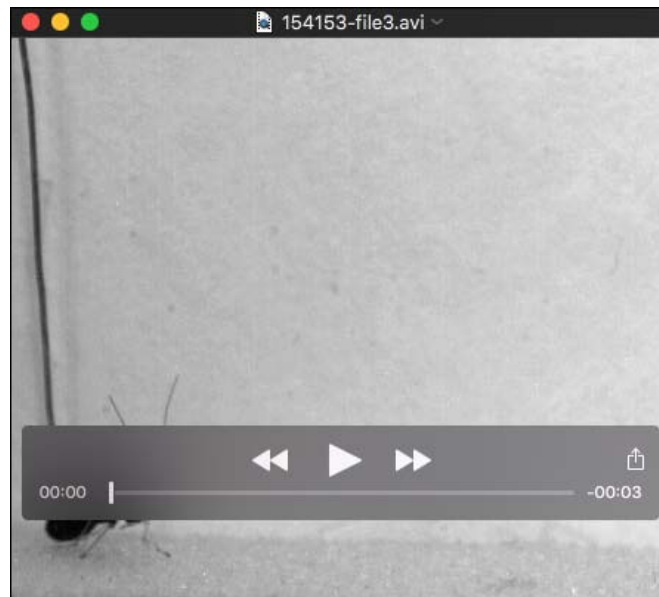

### Movie 3

Jump by *Microtechnites bractatus* viewed from the side, captured at 1000 frames  $s^{-1}$  and with an exposure time of 0.2 ms and replayed at 10 frames  $s^{-1}$ . See also Fig. 5.

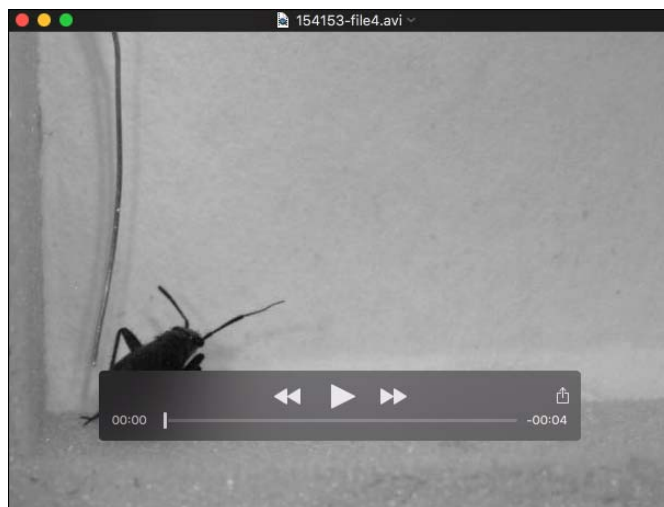

## Movie 4

Jump by *Orthocephalus saltator* viewed from behind, captured at 1000 frames  $s^{-1}$  and with an exposure time of 0.2 ms and replayed at 10 frames  $s^{-1}$ . See also Fig. 7.

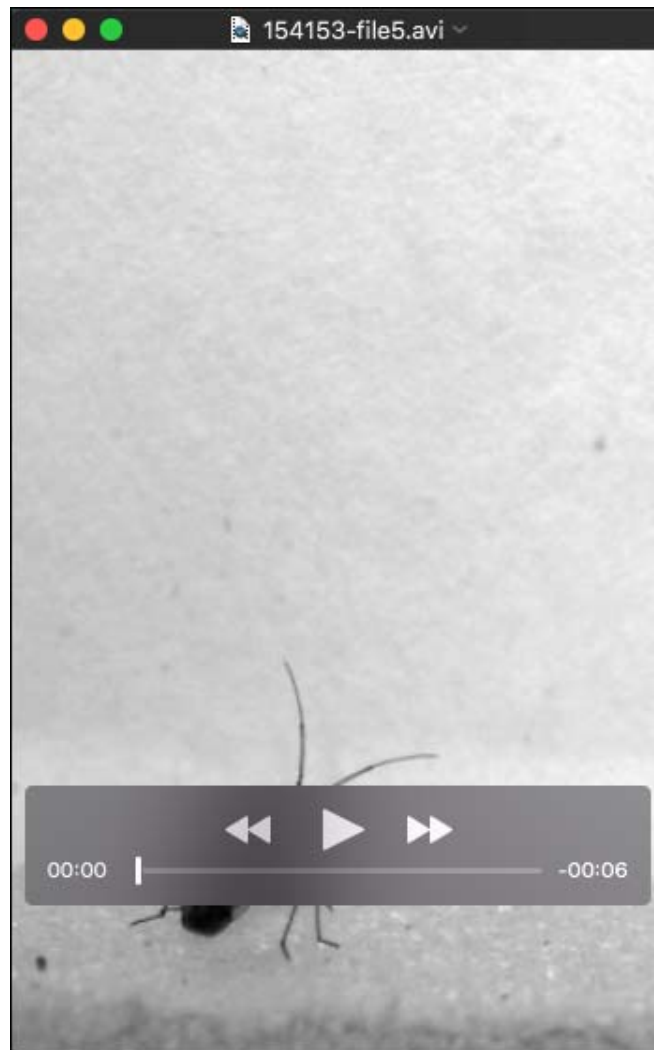

## Movie 5

Jump by *Plagiognathus* sp. viewed from behind, captured at 1000 frames  $s^{-1}$  and with an exposure time of 0.2 ms and replayed at 10 frames  $s^{-1}$ . See also Fig. 9.
